# Supplementary material for: Spinal neuron diversity scales exponentially with swim-to-limb transformation during frog metamorphosis
Source: PubMed Central journal article supplement — bioRxiv. 2024 Sep 27:2024.09.20.614050. Originally published 2024 Sep 21. Preprint. [Version 2] doi: 10.1101/2024.09.20.614050 (PMC11430061; doi:10.1101/2024.09.20.614050), 2024-09-27
Supplement: media-1.pdf [file media-1.pdf]

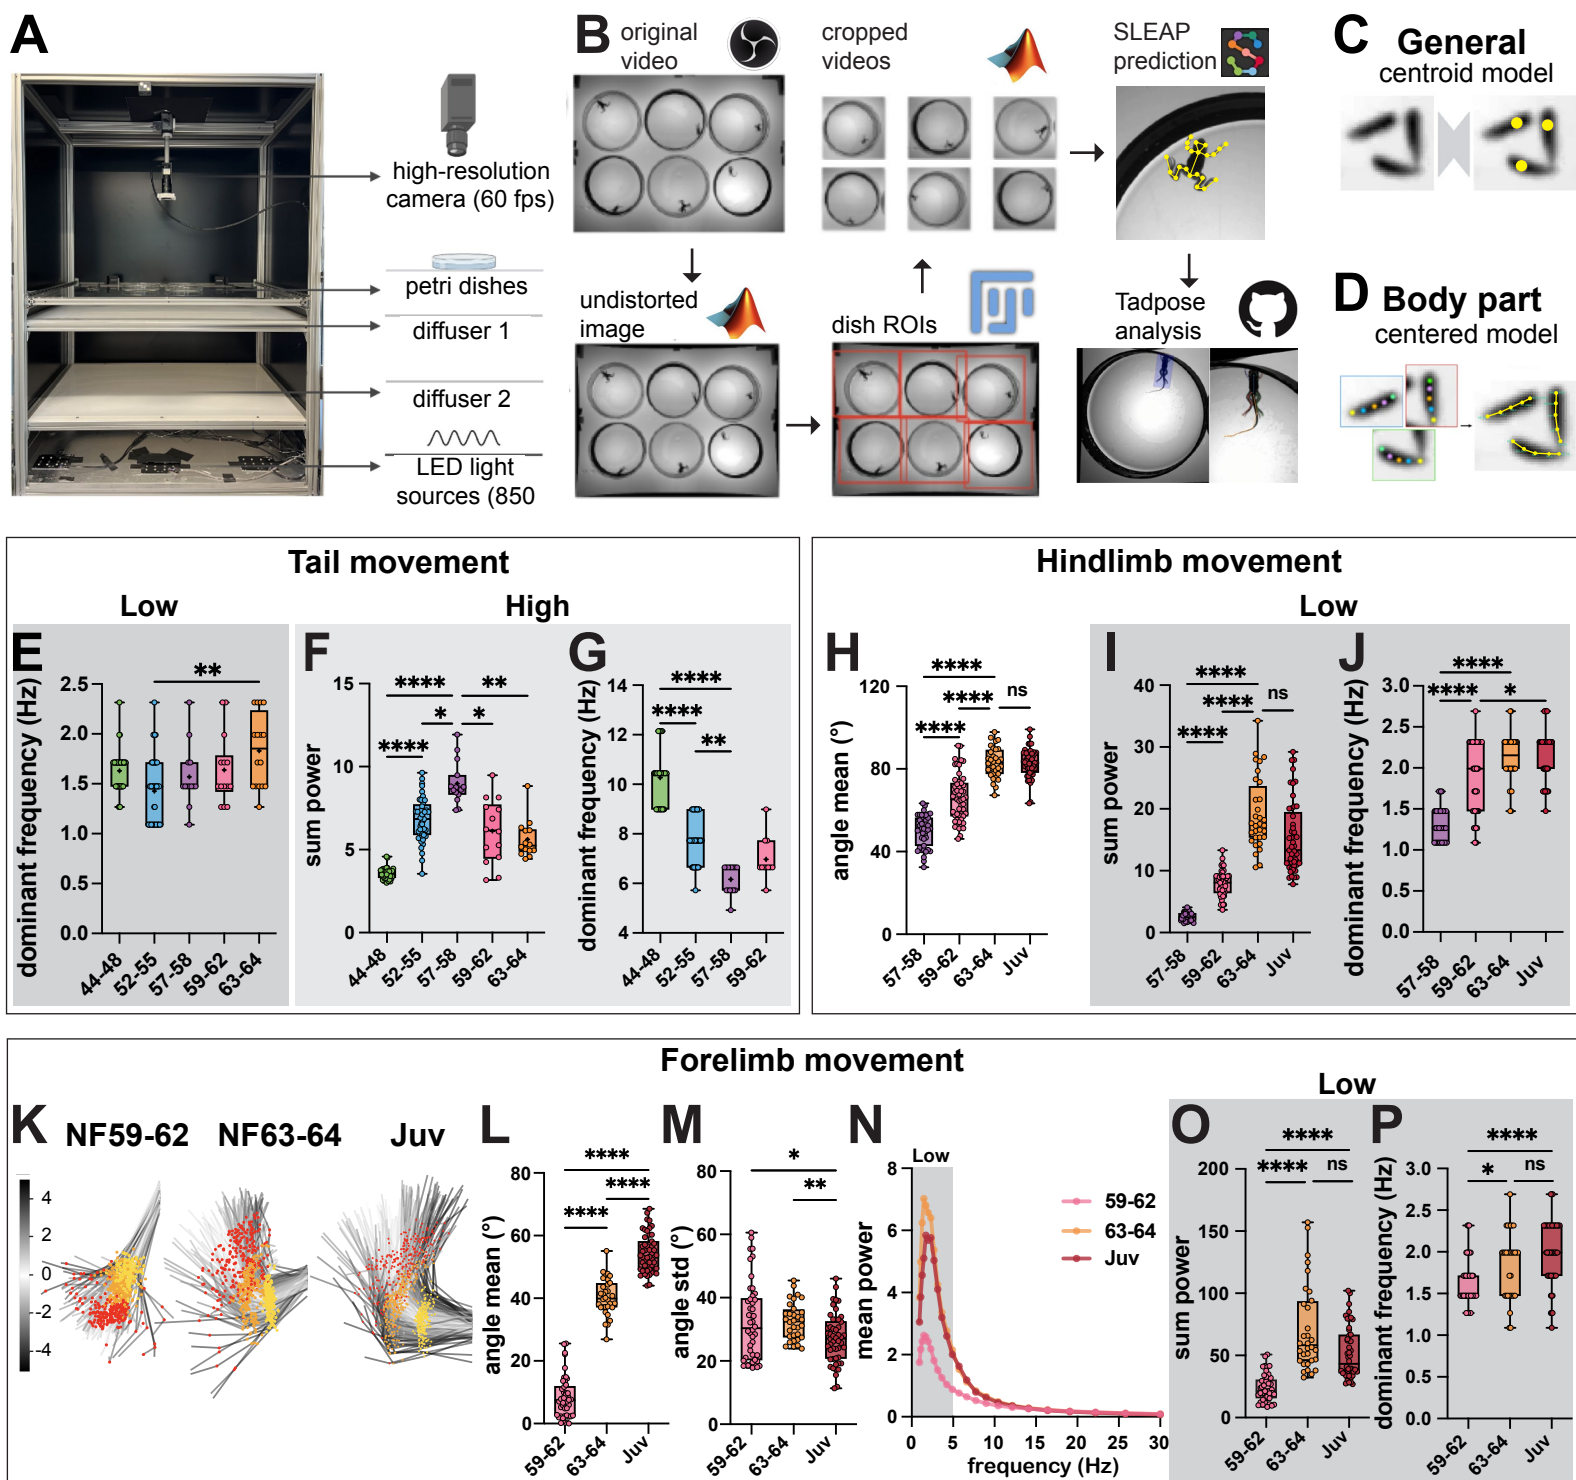

**Figure S1**

## Tail movement along the rostrocaudal axis

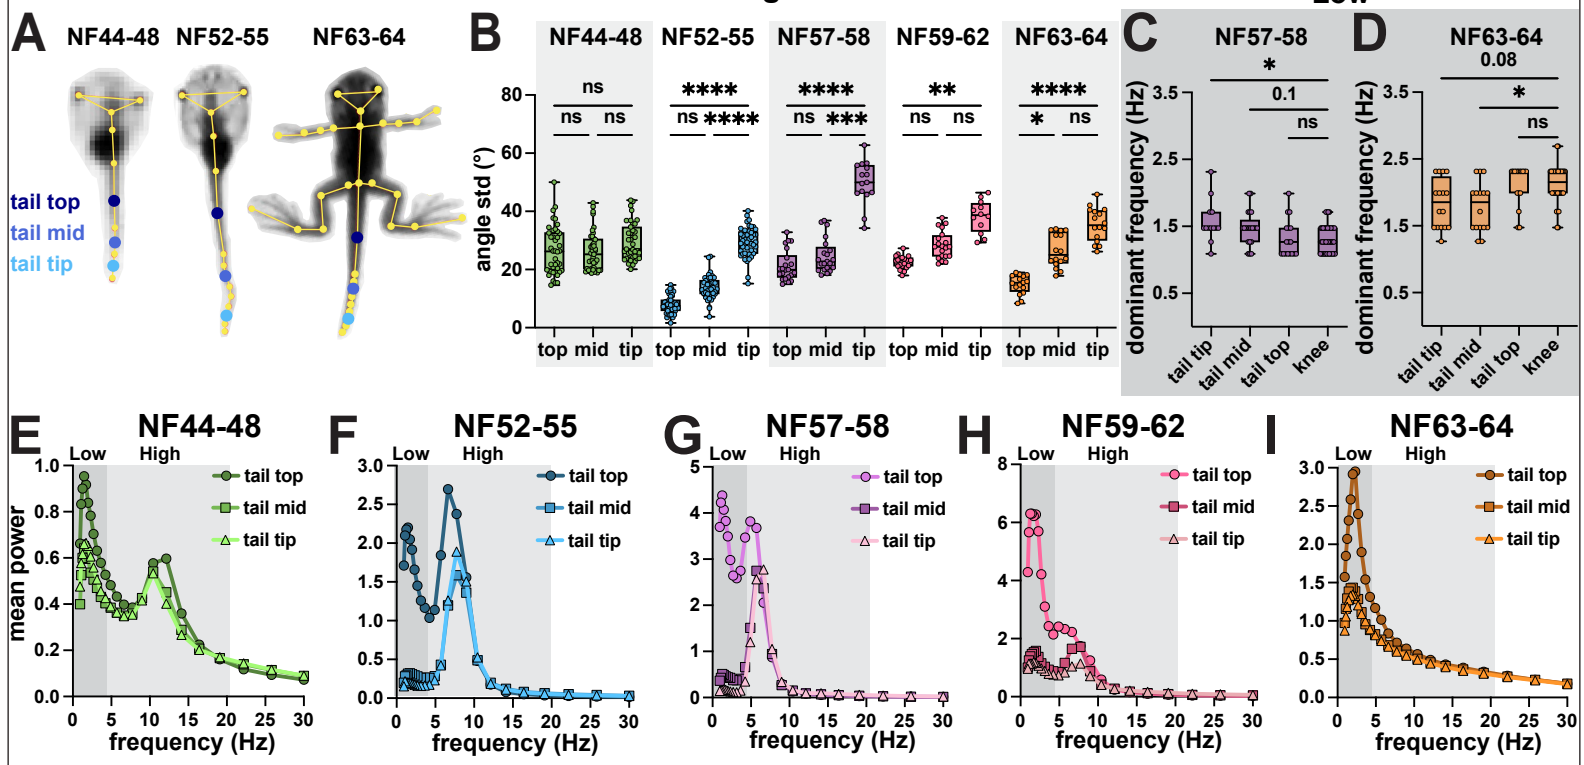

## Limb movement along the proximodistal axis

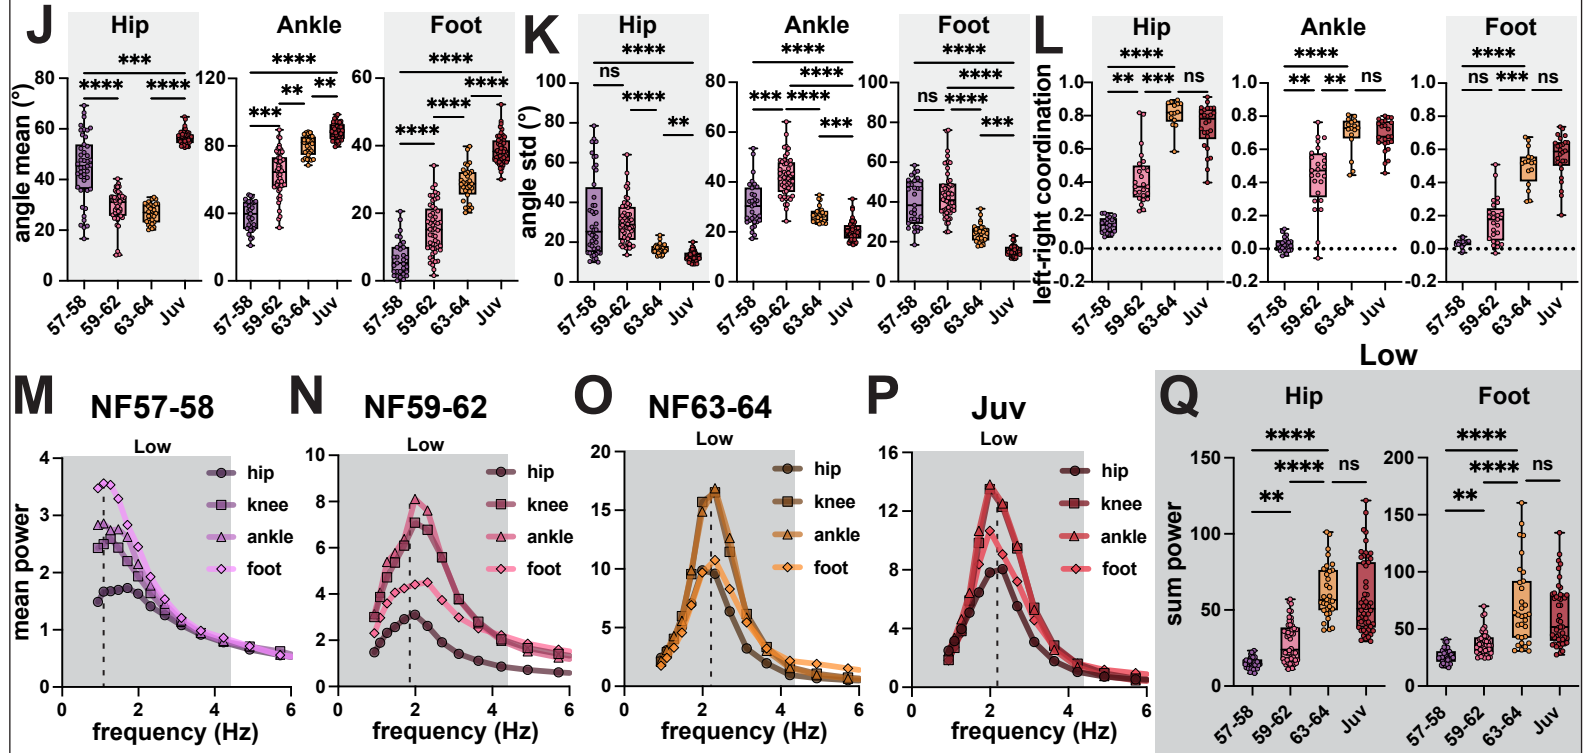

Figure S2

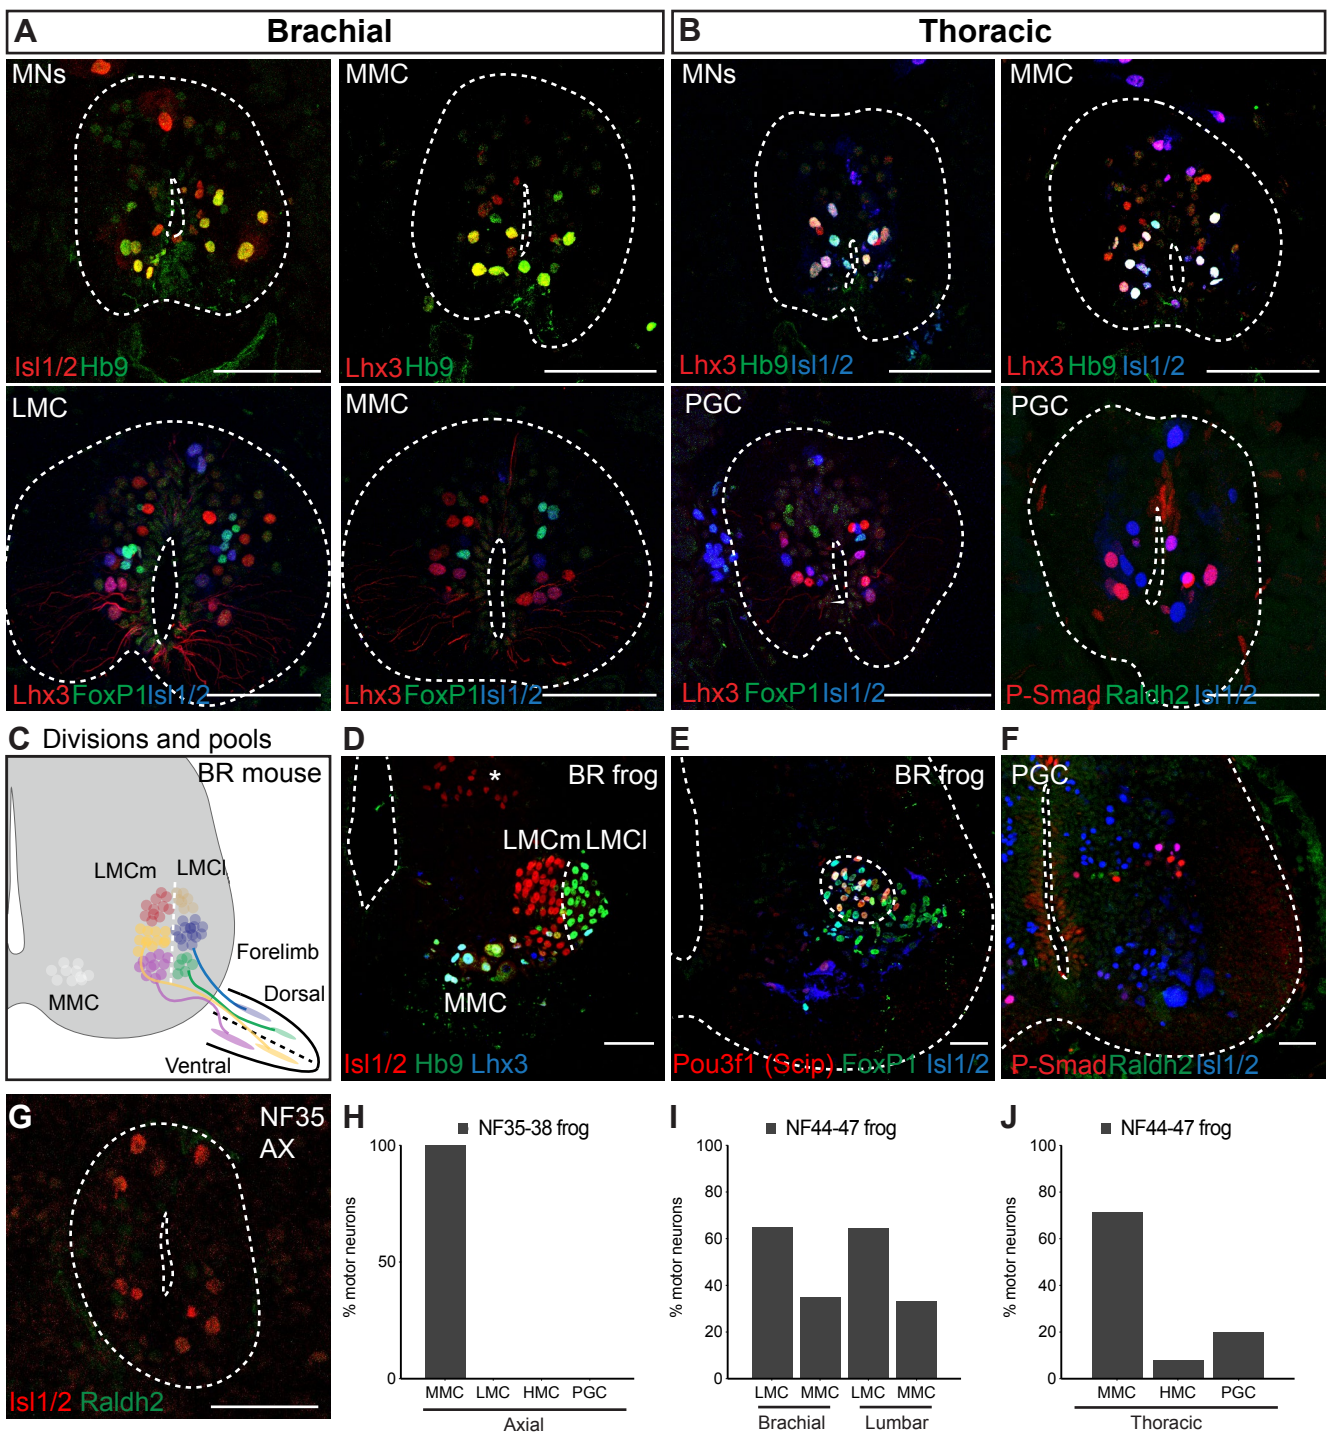

**Figure S3**

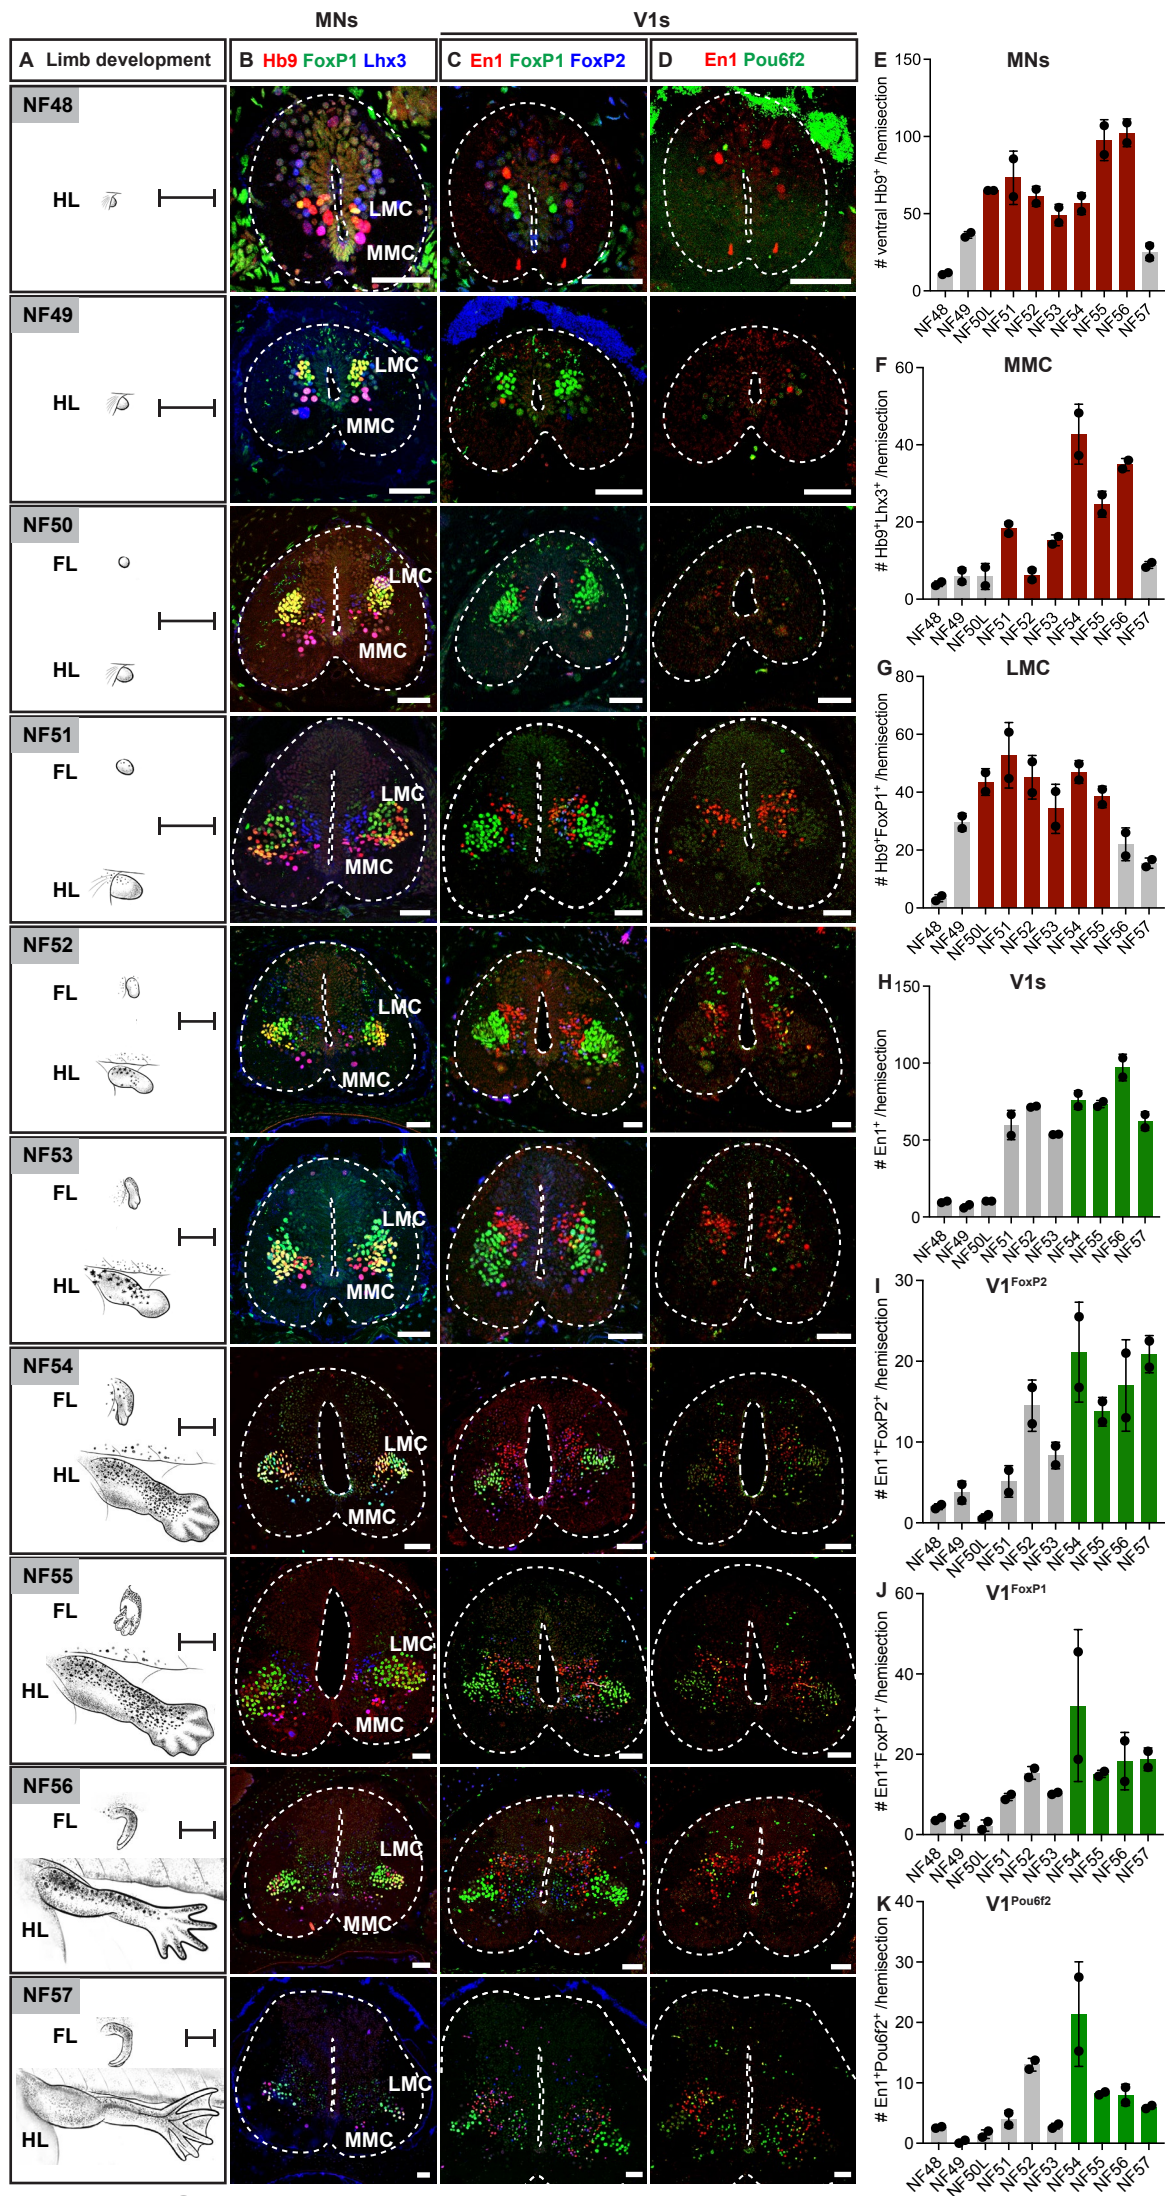

**Figure S4**

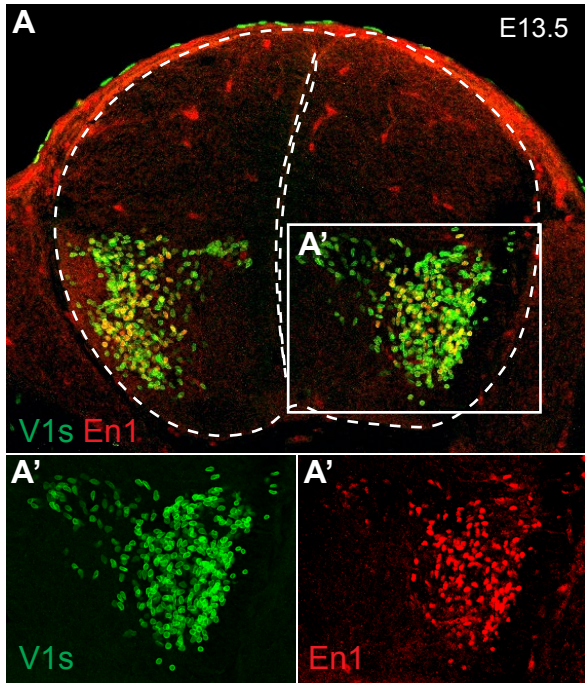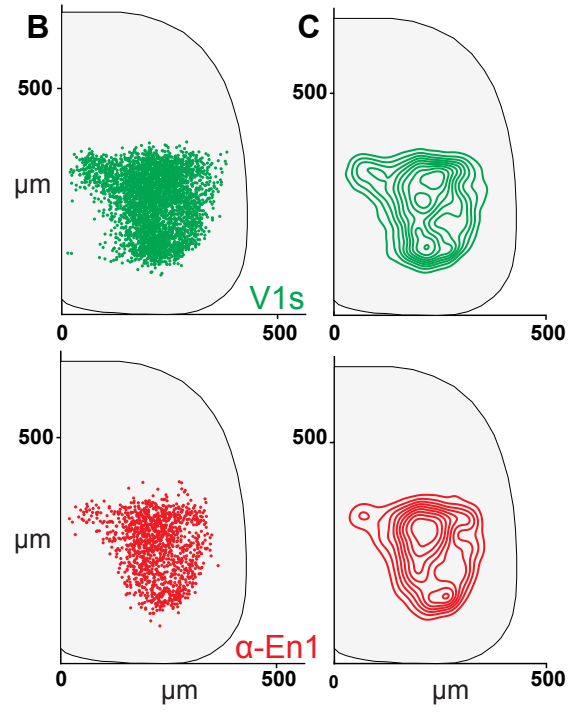

**Figure S5**



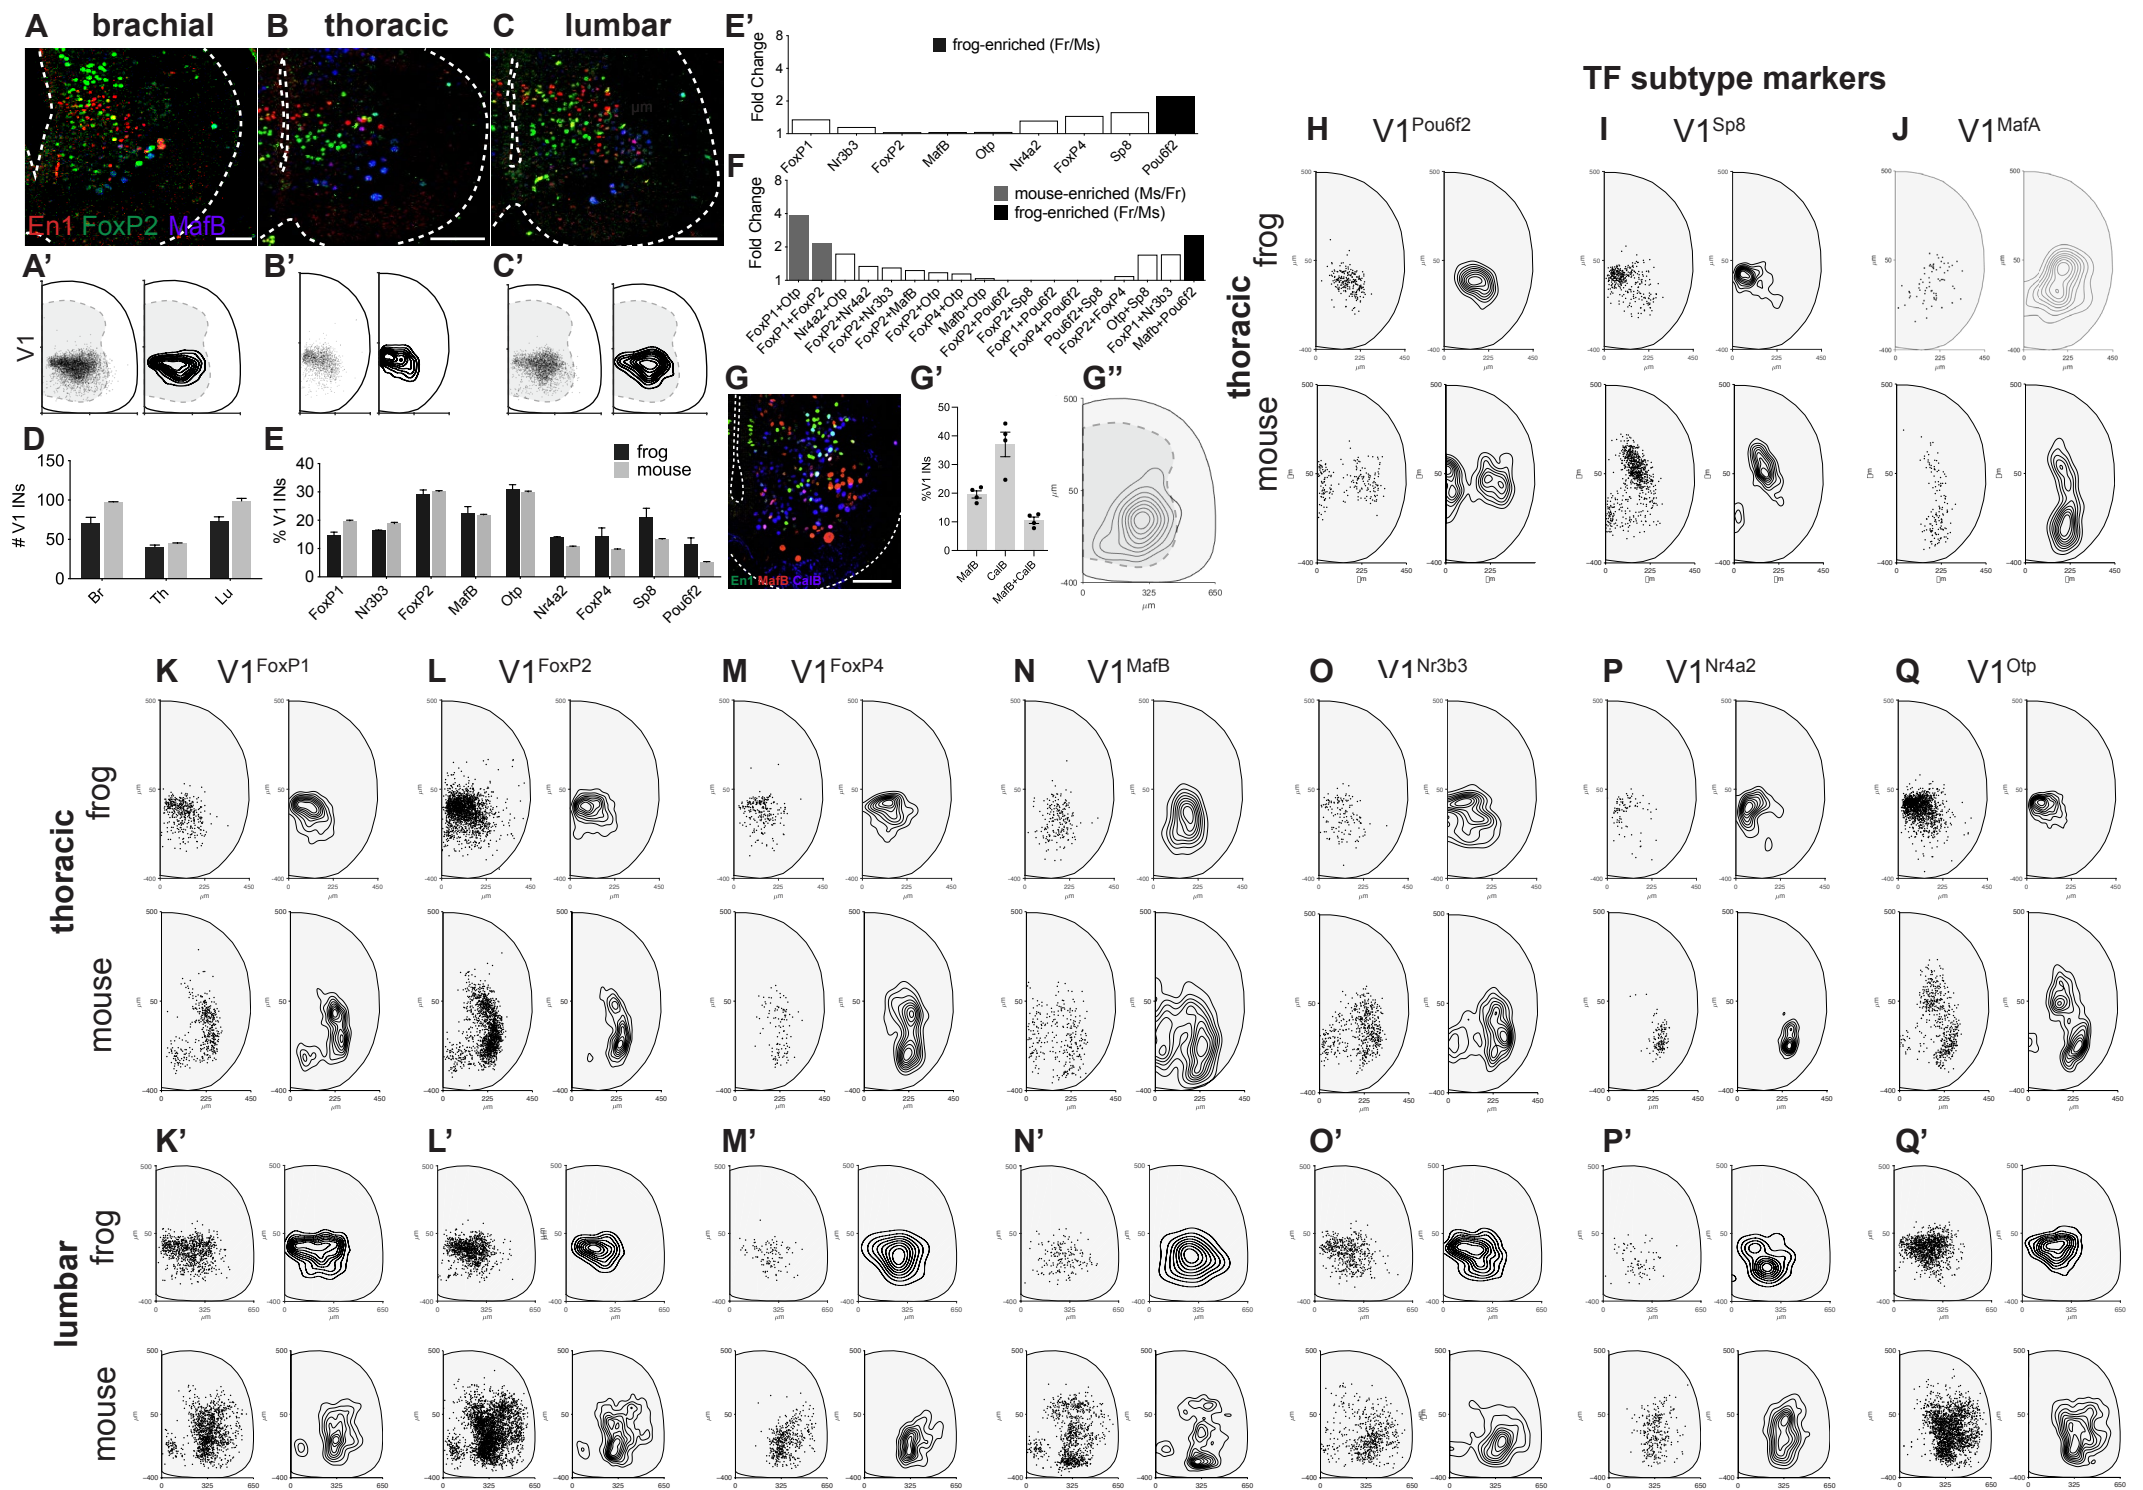

**Figure S7**

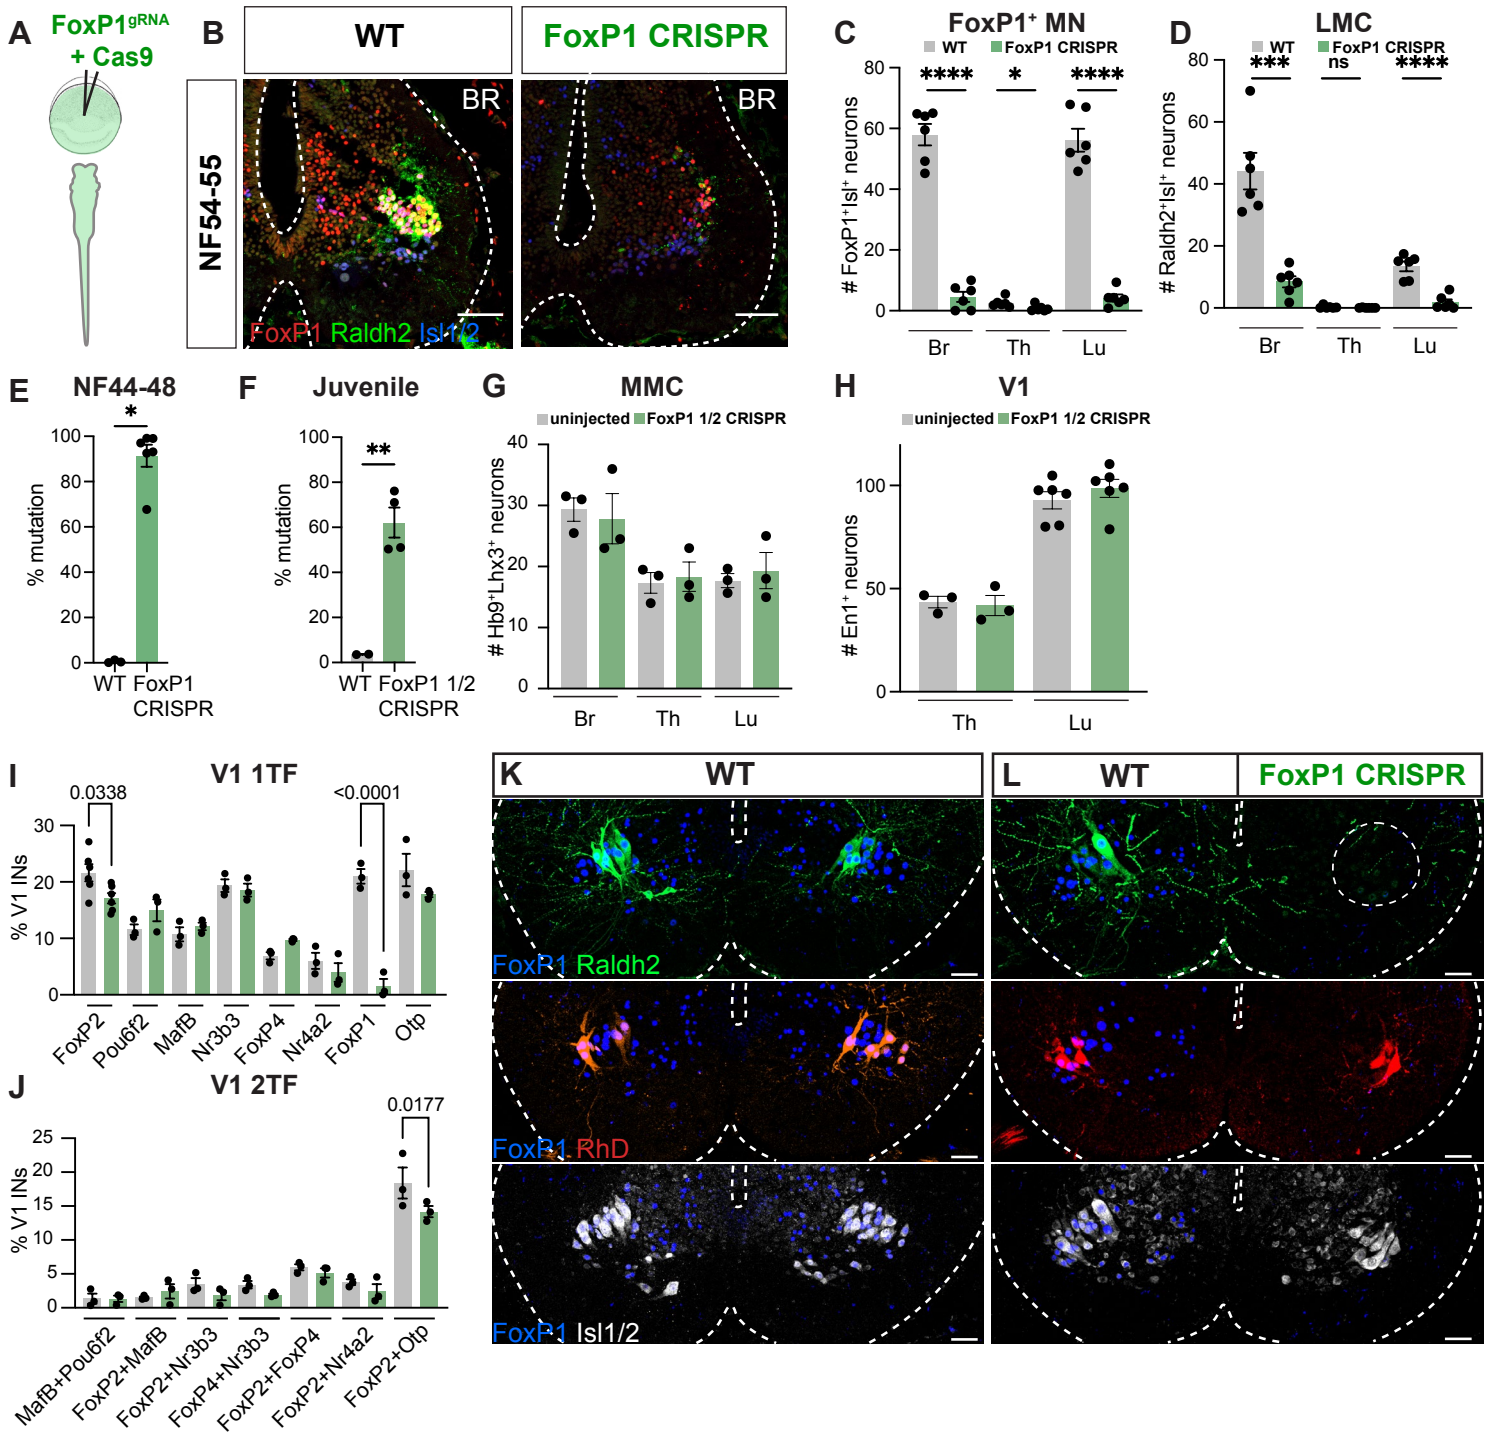

**Figure S8**



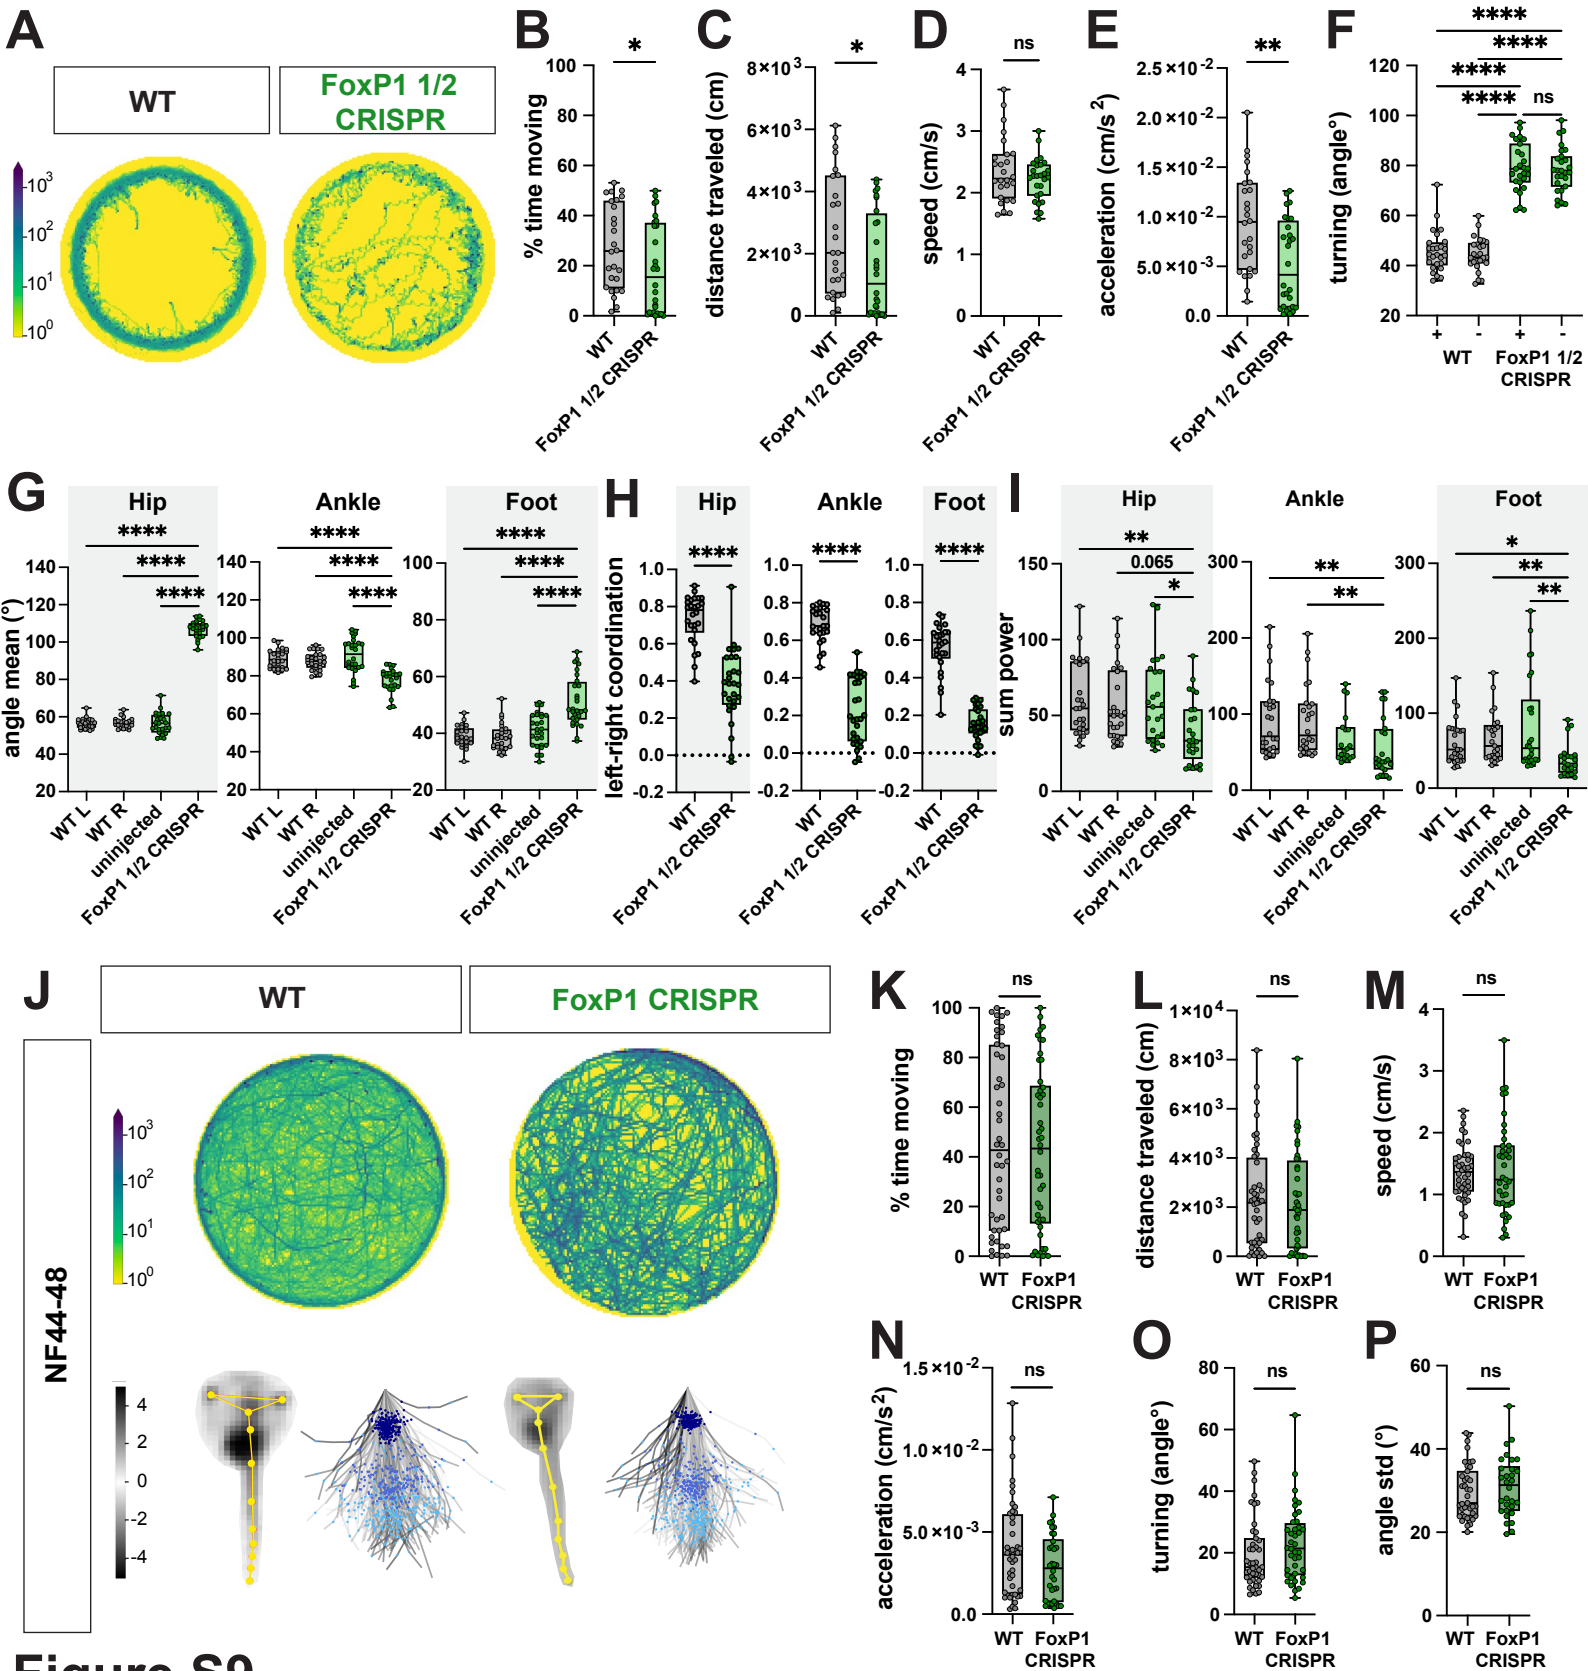

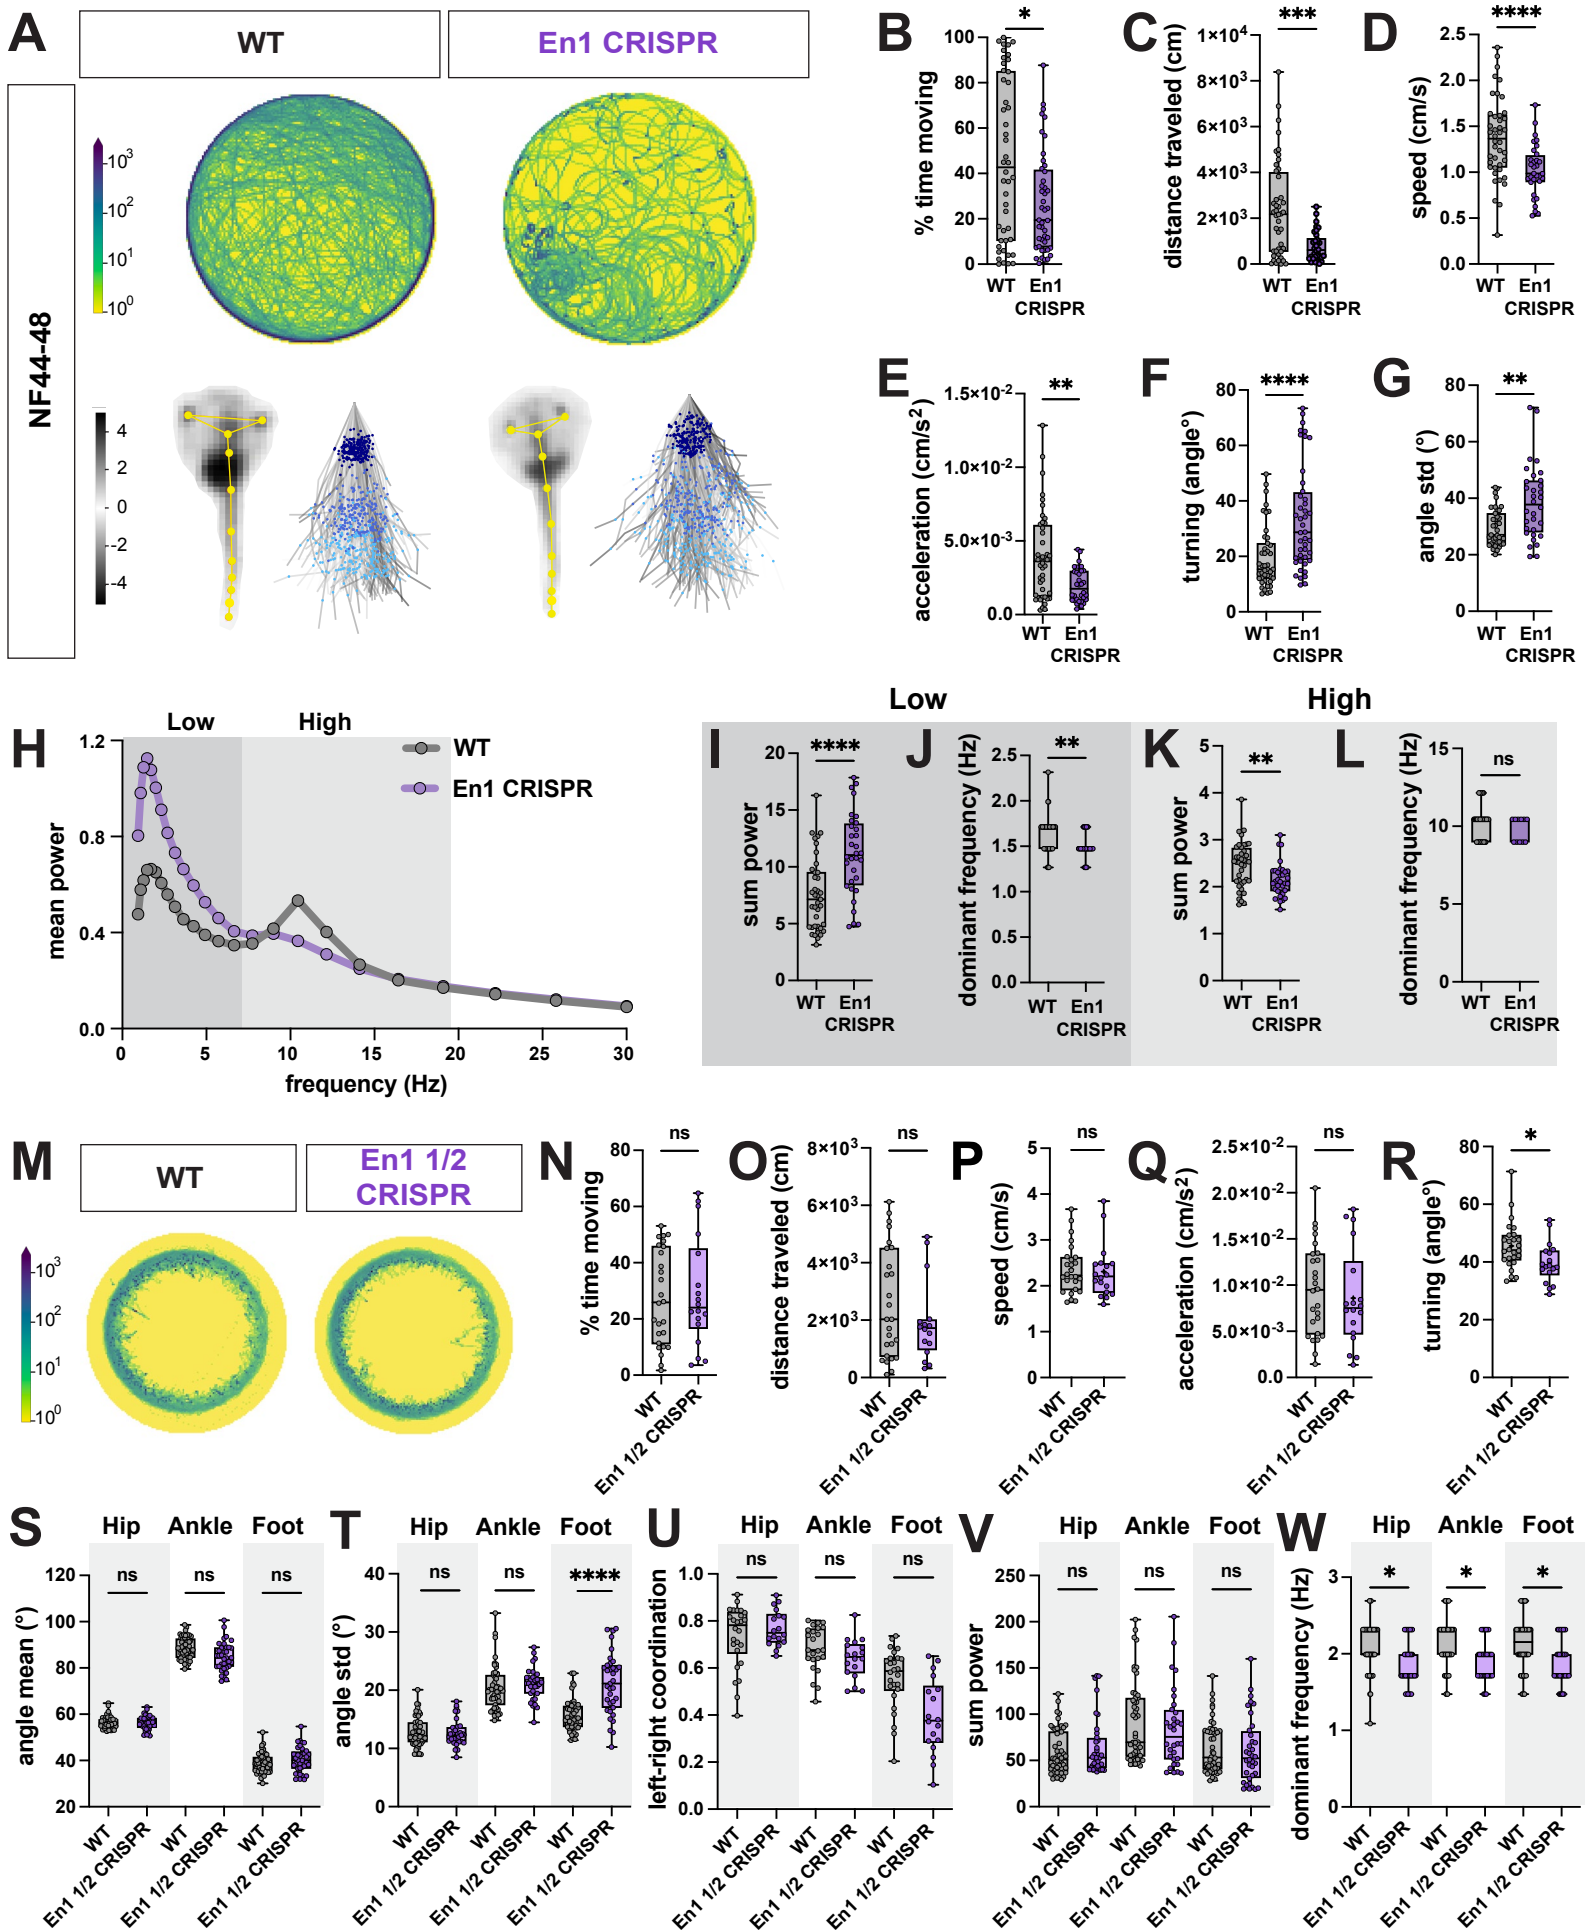

**Figure S10**
