# Supplementary material for: Spinal neuron diversity scales exponentially with swim-to-limb transformation during frog metamorphosis
Source: PubMed Central journal article supplement — bioRxiv. 2024 Sep 27:2024.09.20.614050. Originally published 2024 Sep 21. Preprint. [Version 2] doi: 10.1101/2024.09.20.614050 (PMC11430061; doi:10.1101/2024.09.20.614050), 2024-09-27
Supplement: media-2.pdf [file media-2.pdf]

| Number | Name            | Sequence                 | Purpose         | Source |
|--------|-----------------|--------------------------|-----------------|--------|
| SP533  | GFP_for         | GCACGACTTCTTCAAGTCCGCCAT | Genotyping      | IDT    |
| SP534  | GFP_rev2        | GCGGATCTTGAAGTTCACCTTGAT | Genotyping      | IDT    |
| SP154  | FoxP1_gRNA1_for | GGAGTGAGGGCATCATTTGT     | Genotyping      | IDT    |
| SP155  | FoxP1_gRNA1_rev | GGTAAGGGAGGGAGGTAACG     | Genotyping/TIDE | IDT    |
| SP01   | En1_gRNA4_for   | GGAGAATTGTTGGAAGGGAGA    | Genotyping      | IDT    |
| SP02   | En1_gRNA4_rev   | AGTAGATTTCCCTGTTGCTGG    | Genotyping/TIDE | IDT    |

**Table S1:** Primer sequences used for PCR genotyping and TIDE analysis.

| <b>Target gene</b> | <b>Name</b> | <b>Sequence</b>         | <b>Purpose</b>                              | <b>Source</b> |
|--------------------|-------------|-------------------------|---------------------------------------------|---------------|
| FoxP1              | FoxP1_gRNA1 | ACTTGTGTAGACTAAGATTATGG | generating bilateral and unilateral mutants | Synthego      |
| En1                | En1_gRNA4   | GCTCAGCAGTGAAGGCTGTTCGG | generating bilateral and unilateral mutants | Synthego      |

**Table S2:** Guide RNA sequences used to generate CRISPR mutants.

| Metrics        |           |                  |               |                  |         |         |
|----------------|-----------|------------------|---------------|------------------|---------|---------|
| Model          | Stage bin | Average distance | Visual recall | Visual Precision | OKS     | mPCK    |
| Centroid model | NF37-38   | 1.03709          | 1             | 1                | 0.94186 | 0.94395 |
|                | NF44-48   | 6.95001          | 1             | 1                | 0.54758 | 0.8125  |
|                | NF52-55   | 0.00001          | 1             | 1                | 0.92079 | 0.85714 |
|                | NF57-58   | 0.00001          | 1             | 1                | 0.47525 | 1       |
|                | NF59-62   | 0.00001          | 1             | 1                | 0.32673 | 1       |
|                | NF63-64   | 0.00001          | 1             | 1                | 0.76238 | 1       |
|                | Juvenile  | 0.00001          | 1             | 1                | 0.62376 | 1       |
| Centered model | NF37-38   | 2.97621          | 0.98443       | 0.99751          | 0.34501 | 0.86163 |
|                | NF44-48   | 6.1345           | 0.93077       | 0.97059          | 0.10264 | 0.71244 |
|                | NF52-55   | 3.44924          | 0.93722       | 0.99524          | 0.33574 | 0.68918 |
|                | NF57-58   | 3.17561          | 0.94041       | 0.95863          | 0.5896  | 0.66311 |
|                | NF59-62   | 2.6415           | 0.99508       | 0.95997          | 0.77718 | 0.68521 |
|                | NF63-64   | 1.71405          | 0.99754       | 0.98901          | 0.81273 | 0.87478 |
|                | Juvenile  | 2.14075          | 0.99657       | 0.97865          | 0.88478 | 0.81674 |

**Table S3:** Metrics of the behavioral tracking models.

| Gene to amplify | Step                 | PCR temperature | Time | Cycles  |
|-----------------|----------------------|-----------------|------|---------|
| <b>FoxP1</b>    | Initial denaturation | 98 °C           | 30s  | 1       |
|                 | Denaturation         | 98 °C           | 5s   | 32      |
|                 | Annealing            | 57.7 - 63.3°C   | 5s   |         |
|                 | Extension            | 72 °C           | 10s  |         |
|                 | Final extension      | 72 °C           | 60s  | 1       |
|                 | Storage              | 12 °C           | ∞    | Storage |
| <b>En1</b>      | Initial denaturation | 98 °C           | 30s  | 1       |
|                 | Denaturation         | 98 °C           | 5s   | 32      |
|                 | Annealing            | 57.3 - 63.3°C   | 5s   |         |
|                 | Extension            | 72 °C           | 10s  |         |
|                 | Final extension      | 72 °C           | 60s  | 1       |
|                 | Storage              | 12 °C           | ∞    | Storage |

**Table S4:** PCR conditions used for genotyping FoxP1 and En1 genes.
